# Supplementary material for: The Influence of Precipitation and Consecutive Dry Days on Burned Areas in Yunnan Province, Southwestern China
Source: Hindawi journal article supplement (doi:10.1155/2014/748923), 2014-01-01
Supplement: f1 [file 748923.f1.doc]

**Supplementary materials：**

**Table S1**：Code, name and location of the meteorological stations in Yunnan

| **Station code** | **name** | **latitude** | **longitude** | **Altitude**  **(0.1m)** |
| --- | --- | --- | --- | --- |
|
| 56444 | Deqin | 28°29' | 98°55' | 33190 |
| 56533 | Gongshan | 27°45' | 98°40' | 15833 |
| 56543 | Zhongdian | 27°50' | 99°42' | 32767 |
| 56548 | Weixi | 27°10' | 99°17' | 23261 |
| 56586 | Zhaotong | 27°44' | 103°55' | 19495 |
| 56643 | Nujiang | 25°52' | 98°51' | 59100 |
| 56651 | Lijiang | 26°52' | 100°13' | 23924 |
| 56664 | Huaping | 26°38' | 101°16' | 12448 |
| 56684 | Huize | 26°25' | 103°17' | 21105 |
| 56739 | Techong | 25°01' | 98°30' | 16546 |
| 56741 | Lushui | 25°59' | 98°49' | 18049 |
| 56748 | Baoshan | 25°07' | 99°11' | 16522 |
| 56751 | Dali | 25°42' | 100°11' | 19905 |
| 56763 | Yuanmou | 25°44' | 101°52' | 11206 |
| 56768 | Chuxiong | 25°02' | 101°33' | 18241 |
| 56778 | Kunming | 25°00' | 102°39' | 18865 |
| 56786 | Zhanyi | 25°35' | 103°50' | 18987 |
| 56838 | Ruili | 24°01' | 97°51' | 7766 |
| 56856 | Jingdong | 24°28' | 100°52' | 11623 |
| 56875 | Yuxi | 24°20' | 102°33' | 17169 |
| 56880 | Yiliang | 24°55' | 103°10' | 15321 |
| 56886 | Luxi | 2432' | 103°46' | 17043 |
| 56946 | Gengma | 23°33' | 99°24' | 11049 |
| 56951 | Lincang | 23°53' | 100°05' | 15024 |
| 56954 | Lancing | 22°34' | 99°56' | 10548 |
| 56959 | Jinghong | 22°00' | 100°47' | 5820 |
| 56964 | Simao | 22°47' | 100°58' | 13021 |
| 56966 | Yuanjiang | 23°36' | 101°59' | 4009 |
| 56969 | Mengla | 21°29' | 101°34' | 6319 |
| 56977 | Jiangcheng | 22°35' | 101°51' | 11205 |
| 56985 | Mengzi | 23°23' | 103°23' | 13007 |
| 56986 | Pingbian | 22°59' | 103°41' | 14141 |
| 56991 | Yanshan | 23°37' | 104°20' | 15611 |
| 56986 | Wenshan | 23°25' | 104°05' | 14141 |
| 56991 | Guangnan | 23°59' | 105°05' | 15611 |

The table presents the code, name, and geographical location of 36 meteorological stations used for this study in Yunnan province, with one station in one prefecture. The observation time of these stations is from 1960 to 2008.
